# Supplementary material
Source: PubMed Central journal article supplement (PMC6410377)

# Supp. Figure 1

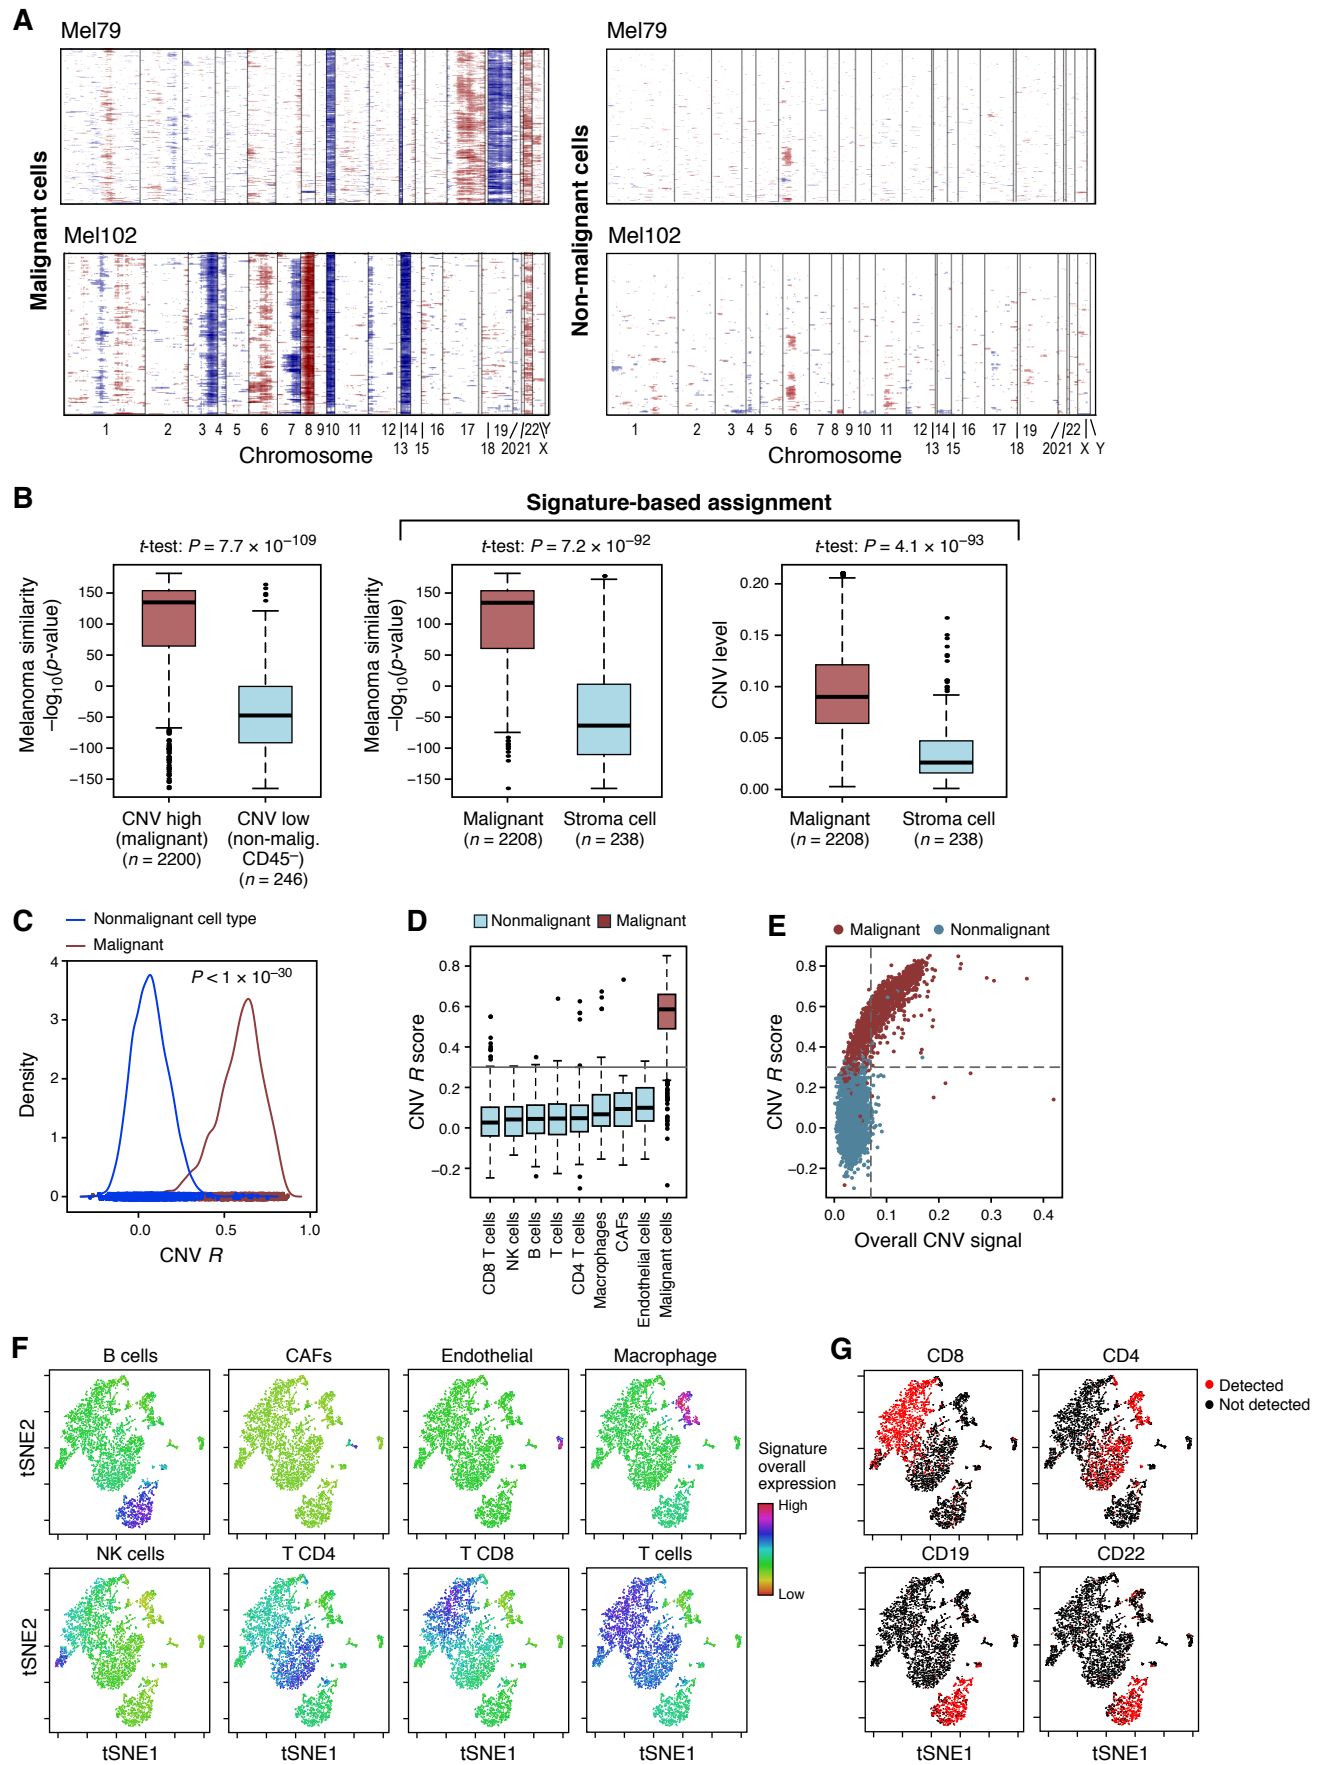

Supplement: NIHMS1508390-supplement-1.pdf [file NIHMS1508390-supplement-1.pdf]

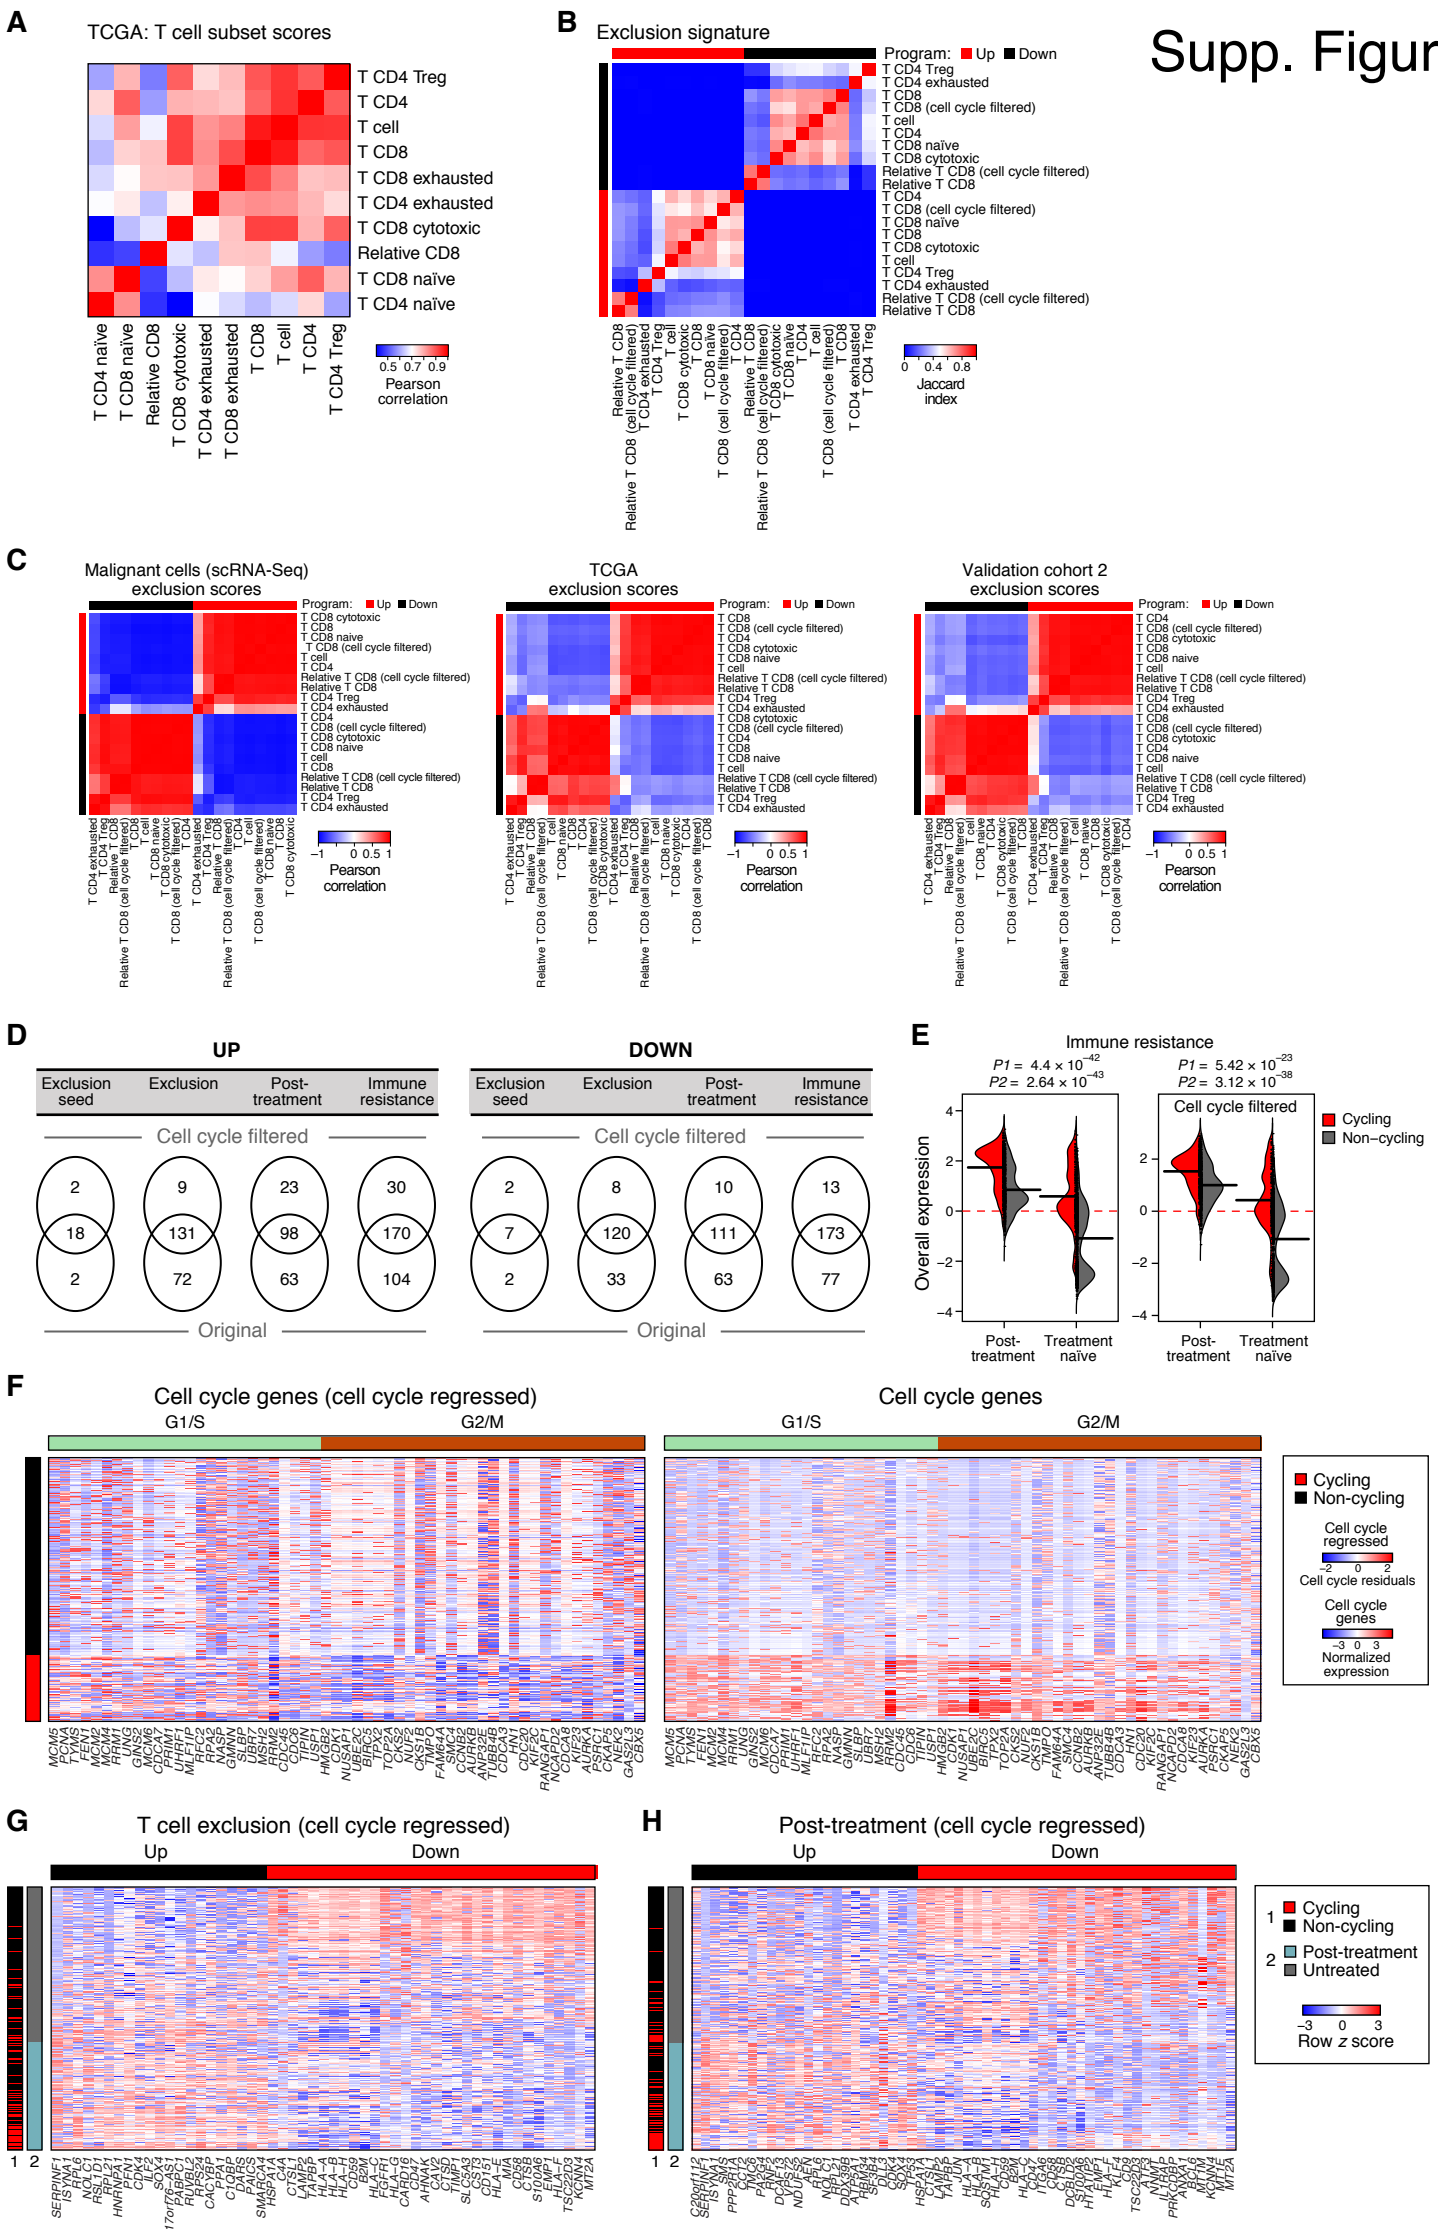

Supplement: NIHMS1508390-supplement-2.pdf [file NIHMS1508390-supplement-2.pdf]

# Supp. Figure 3

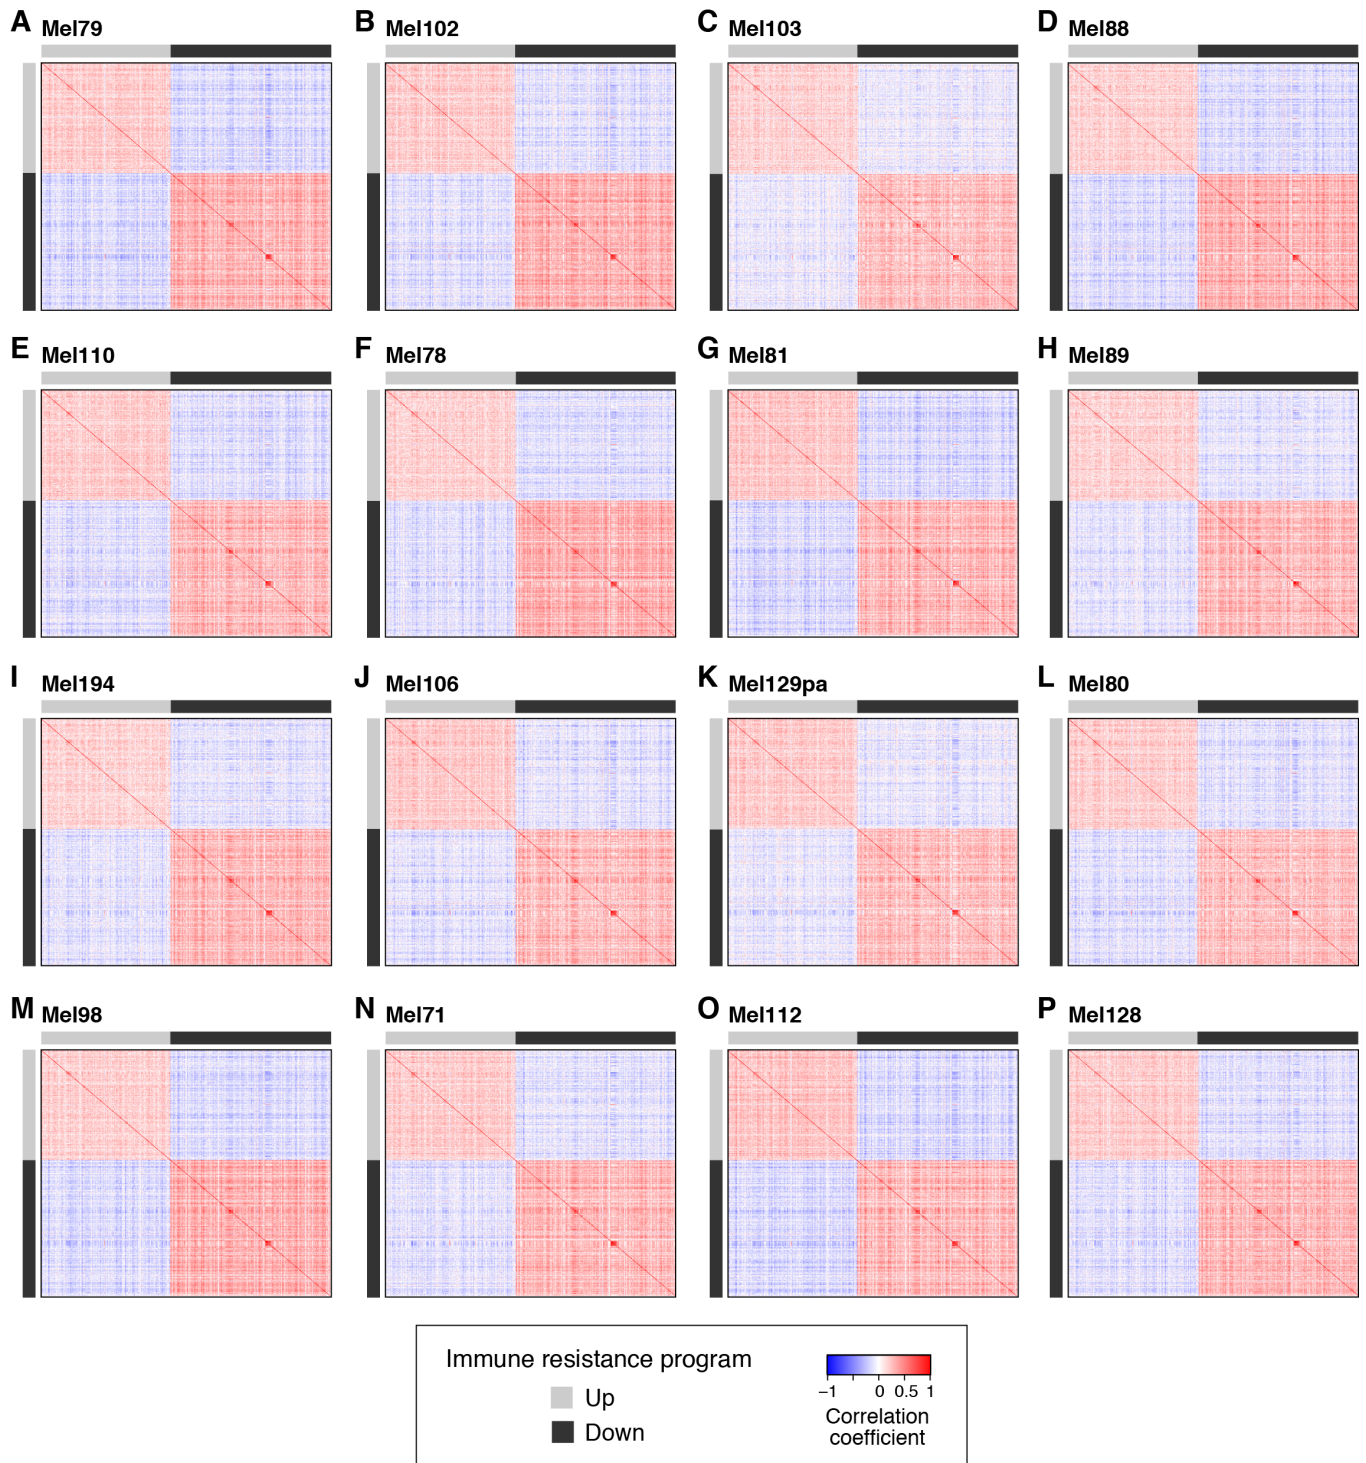

Supplement: NIHMS1508390-supplement-3.pdf [file NIHMS1508390-supplement-3.pdf]

# Supp. Figure 4

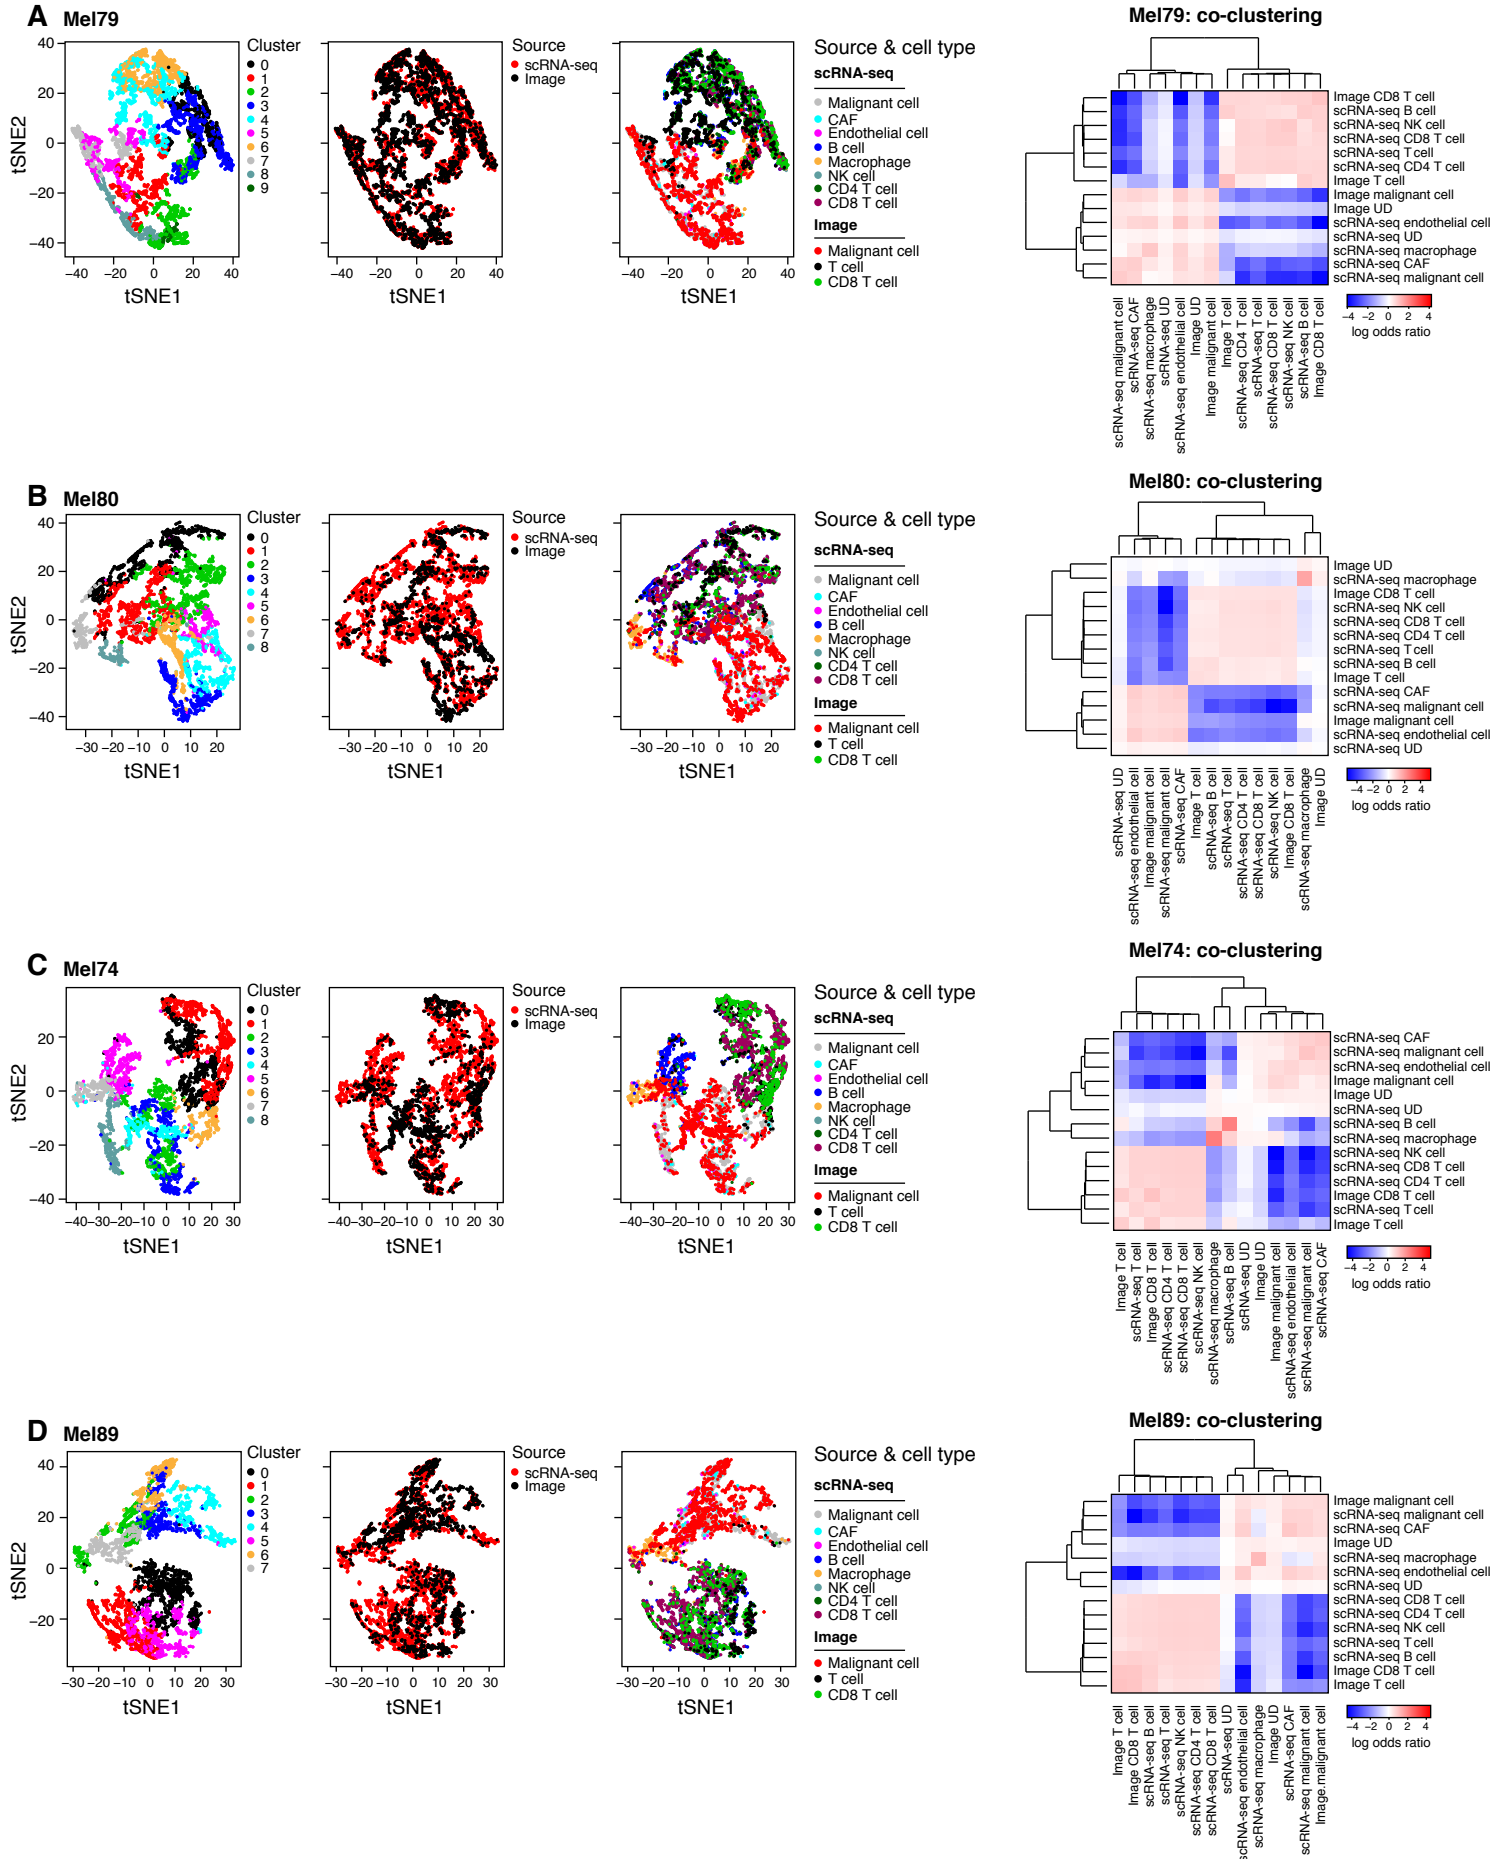

Supplement: NIHMS1508390-supplement-4.pdf [file NIHMS1508390-supplement-4.pdf]

# Supp. Figure 5

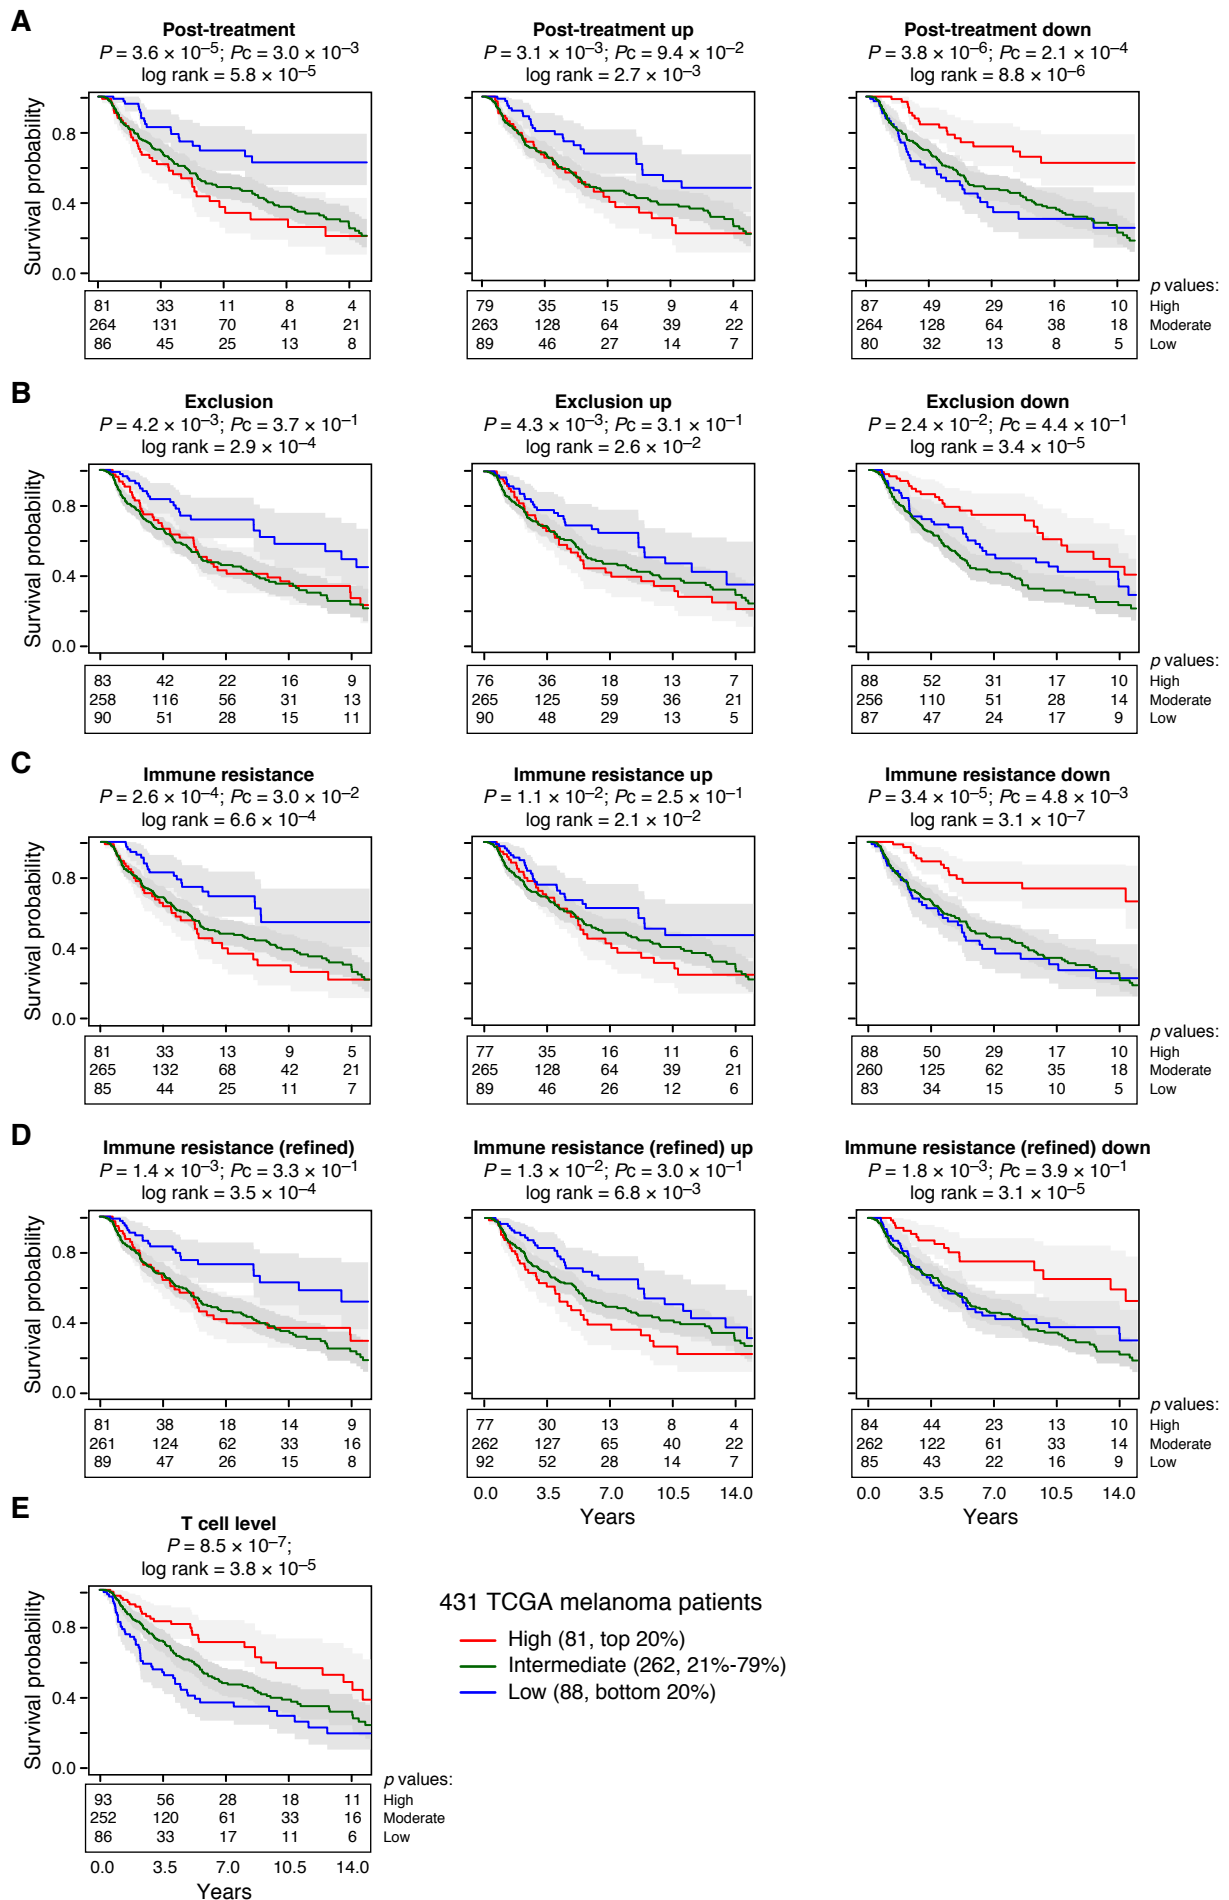

Supplement: NIHMS1508390-supplement-5.pdf [file NIHMS1508390-supplement-5.pdf]

# Supp. Figure 6

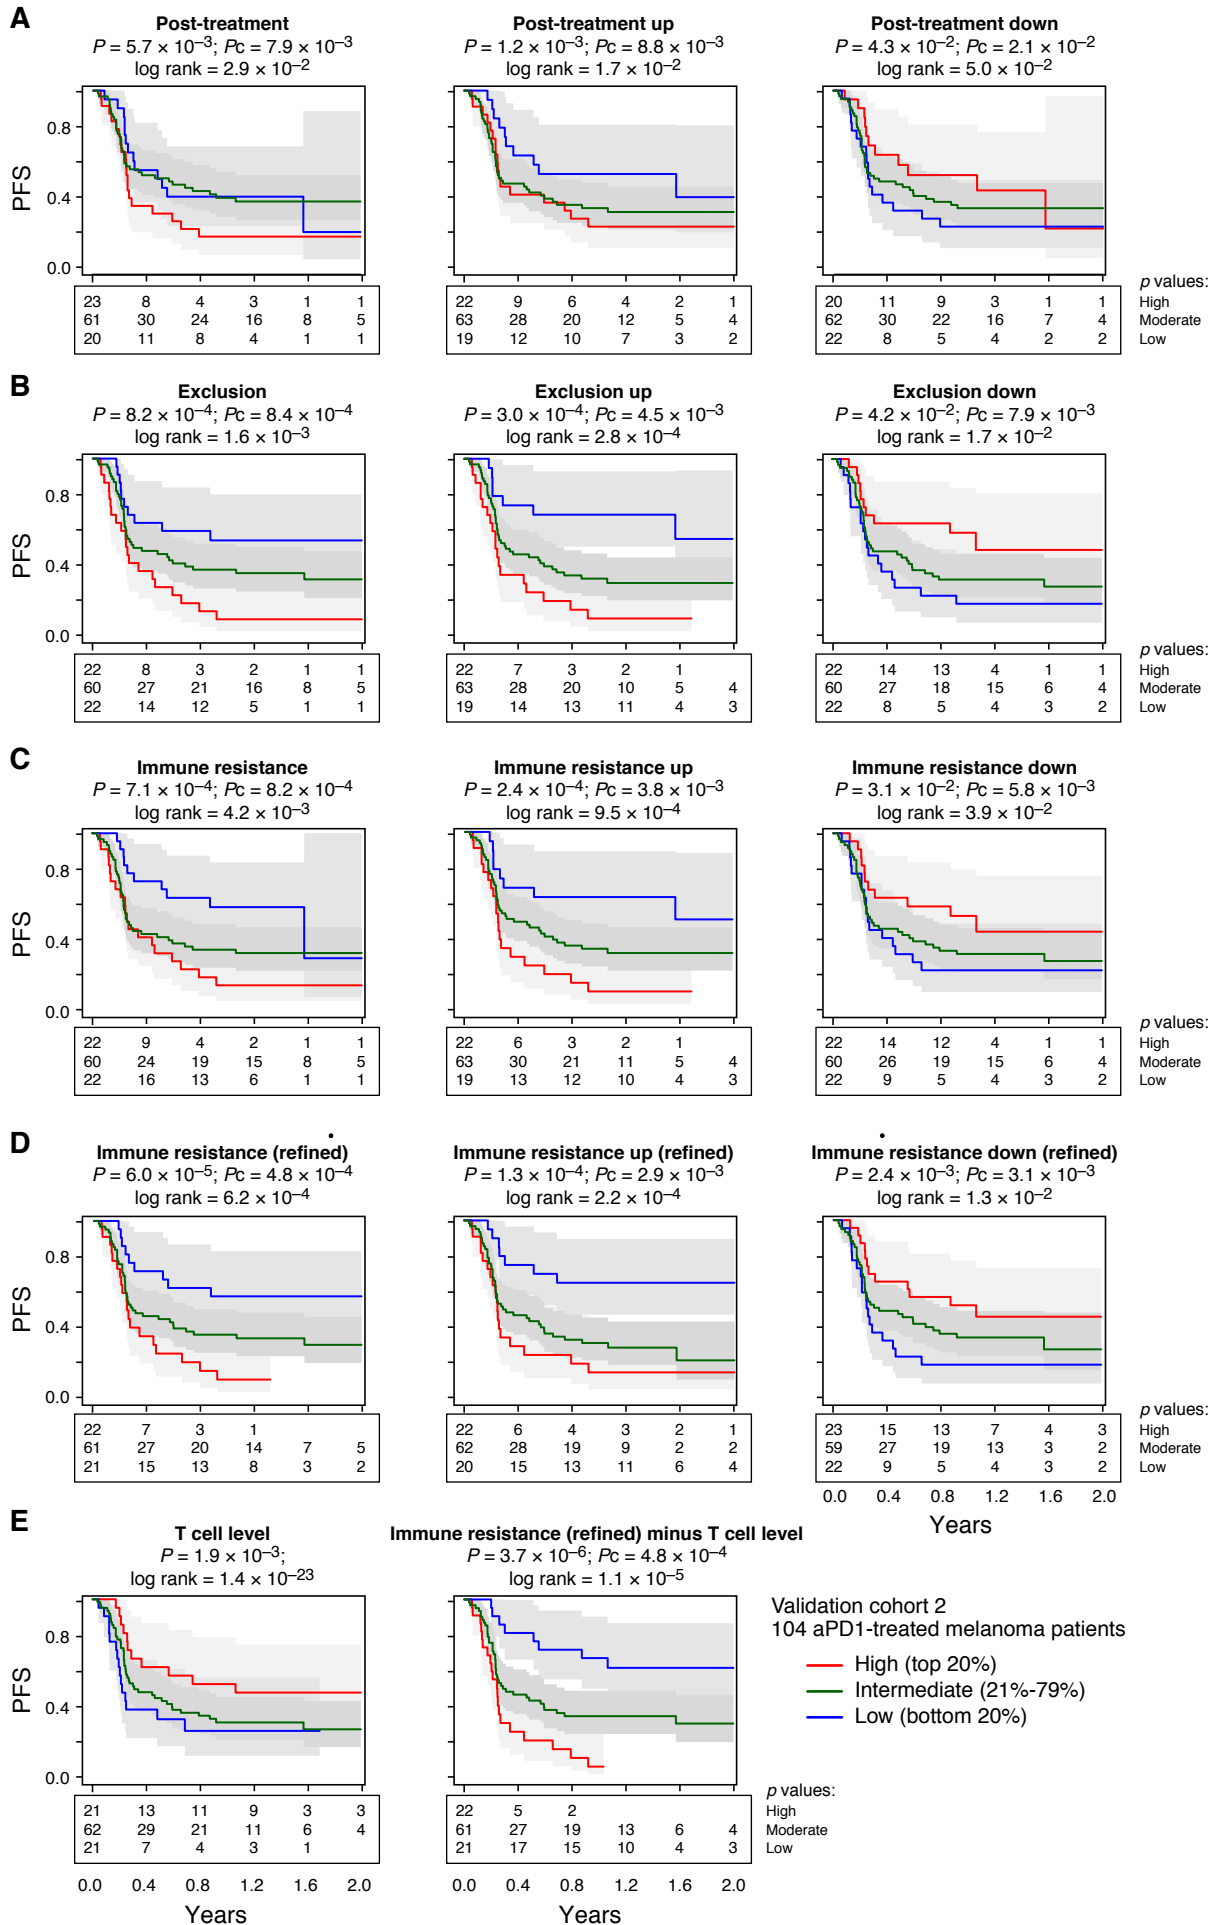

Supplement: NIHMS1508390-supplement-6.pdf [file NIHMS1508390-supplement-6.pdf]

# Supp. Figure 7

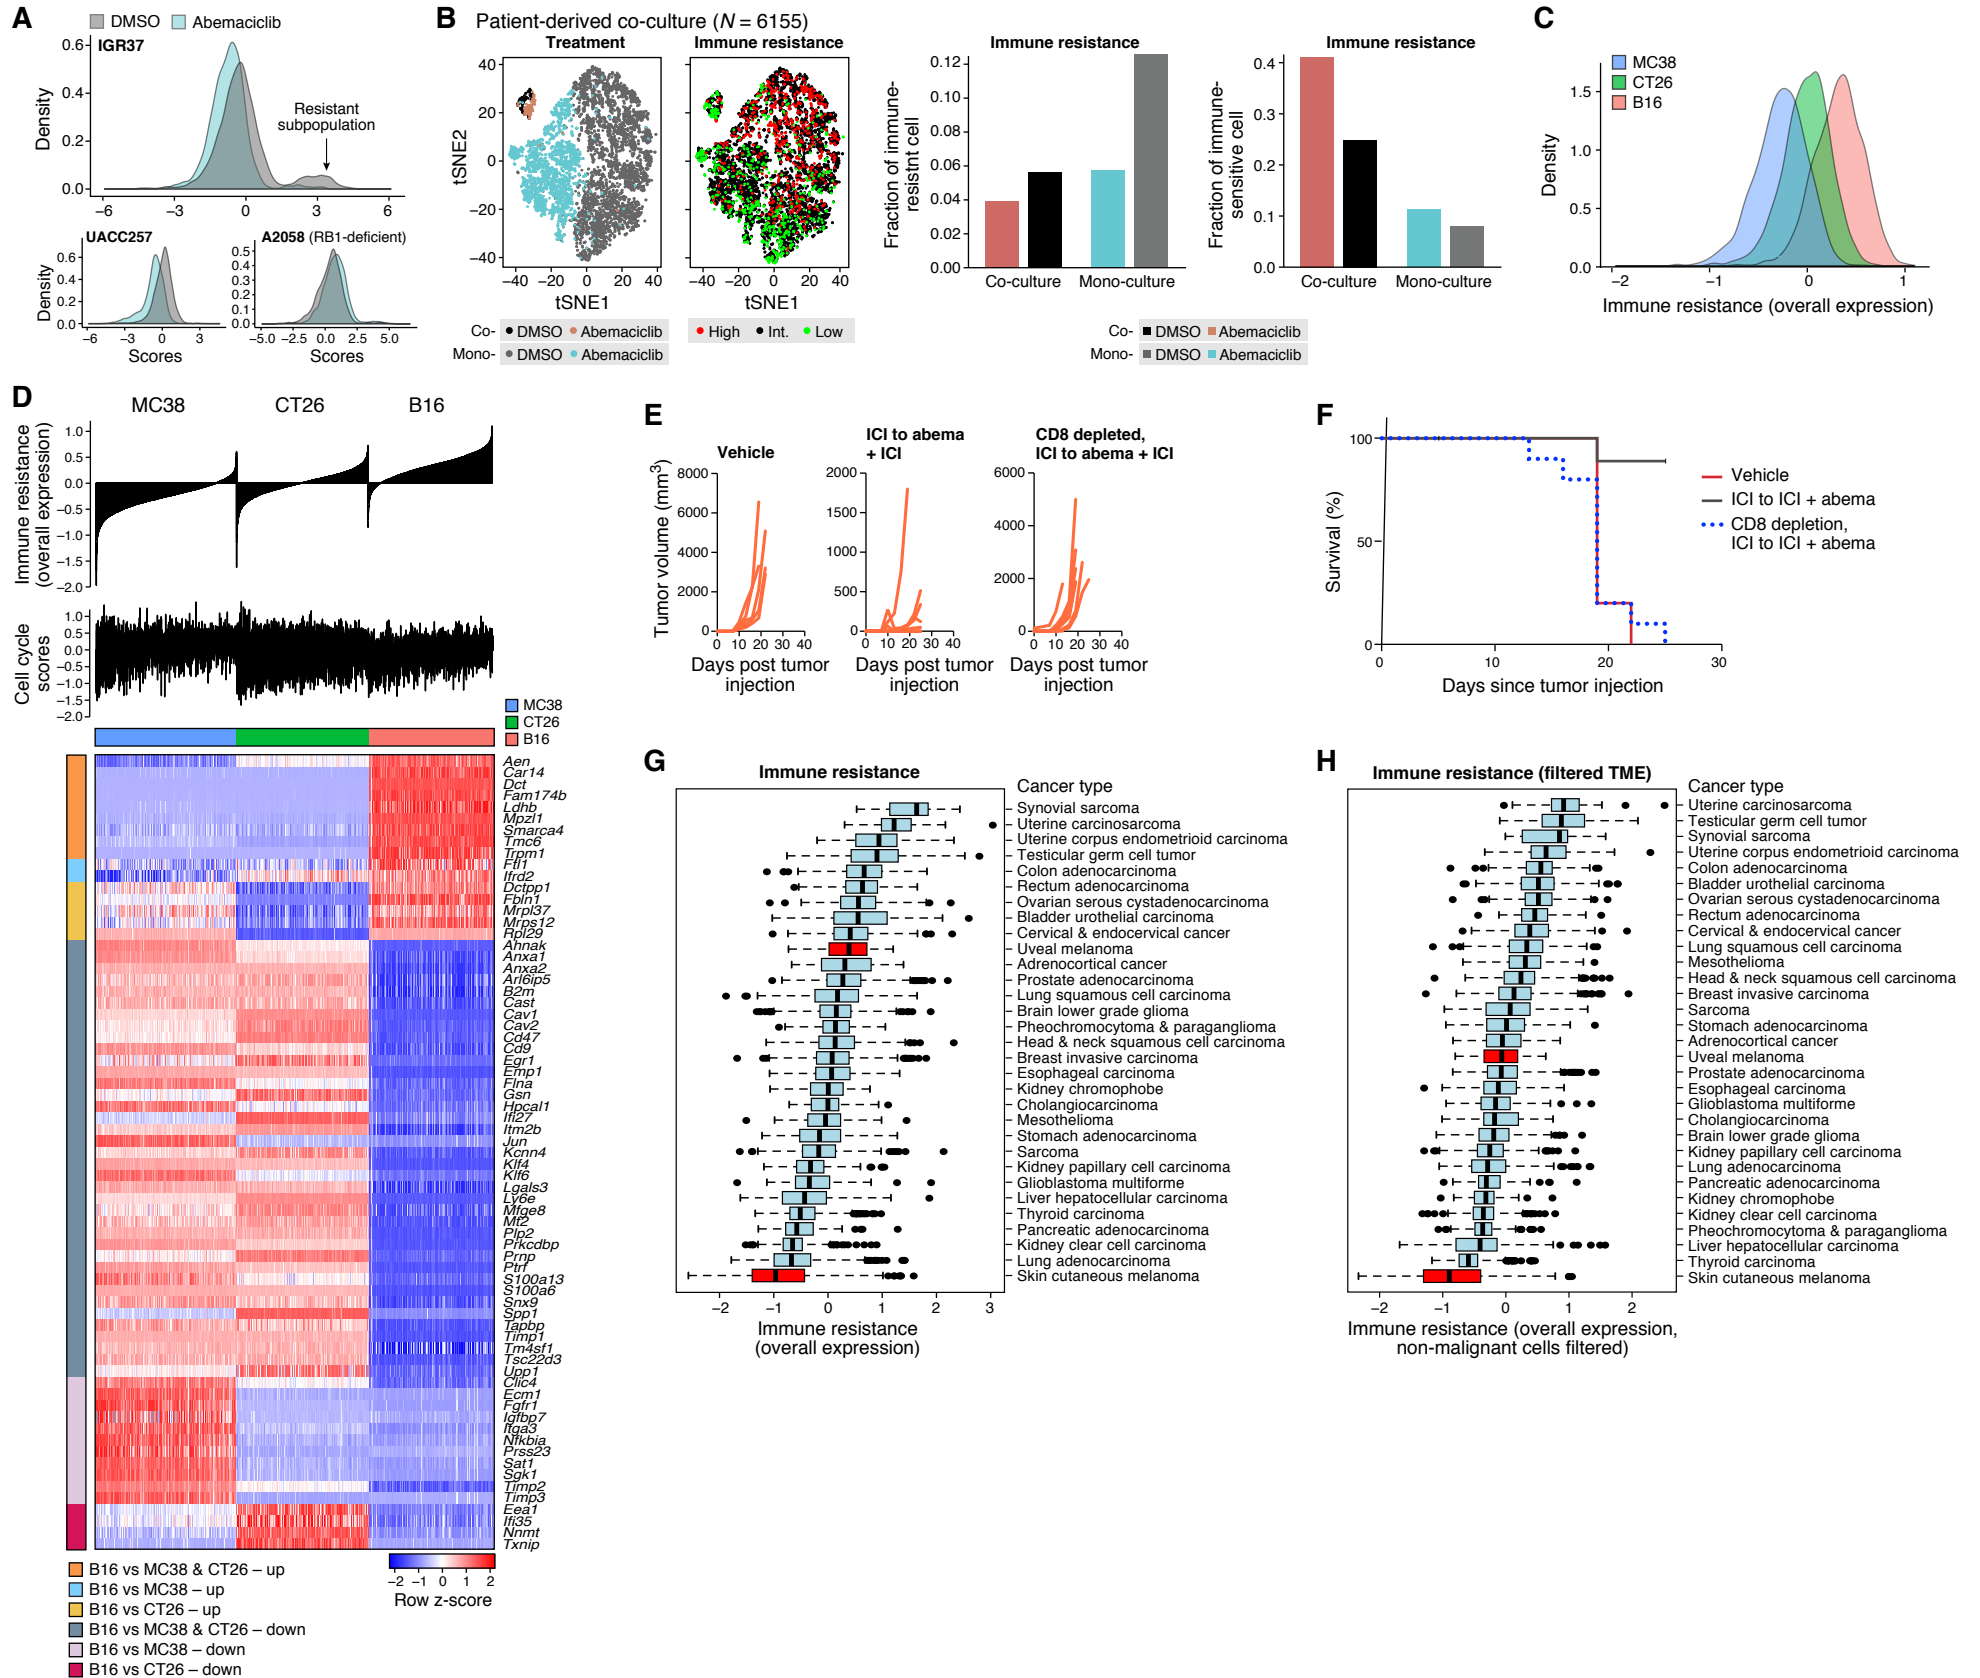

Supplement: NIHMS1508390-supplement-7.pdf [file NIHMS1508390-supplement-7.pdf]
